# Supplementary material
Source: Springer Nature journal article supplement (https://www.springermedizin.de/resource/supplementary/12939_2005_61_MOESM3_ESM.pdf/9551446)
Supplement: MOESM3 [file 9551446]

7 Primary Health Care Facilities (Dispensaries and Health Centers) with physicians, nurses and auxiliaries

75 Health Agents  
(*Agents de Sante*), who  
conduct Rally Posts and  
visit all homes

8 Monitors (*Monitrices*),  
who supervise  
*Animatrices* and  
*Matwons*

18 Auxiliaries  
(*Auxiliares*) who  
staff Mobile  
Clinics

1,500 Volunteers  
(*Animatrices*)

200 Lay Community  
Midwives (*Matwons*)
